# Supplementary material for: Nuclear envelope deformation controls cell cycle progression in response to mechanical force
Source: PubMed Central journal article supplement (PMC6726894; doi:10.15252/embr.201948084), 2019-08-01
Supplement: EMBR-20-e48084-s001.pdf [file EMBR-20-e48084-s001.pdf]

## Expanded View Figures

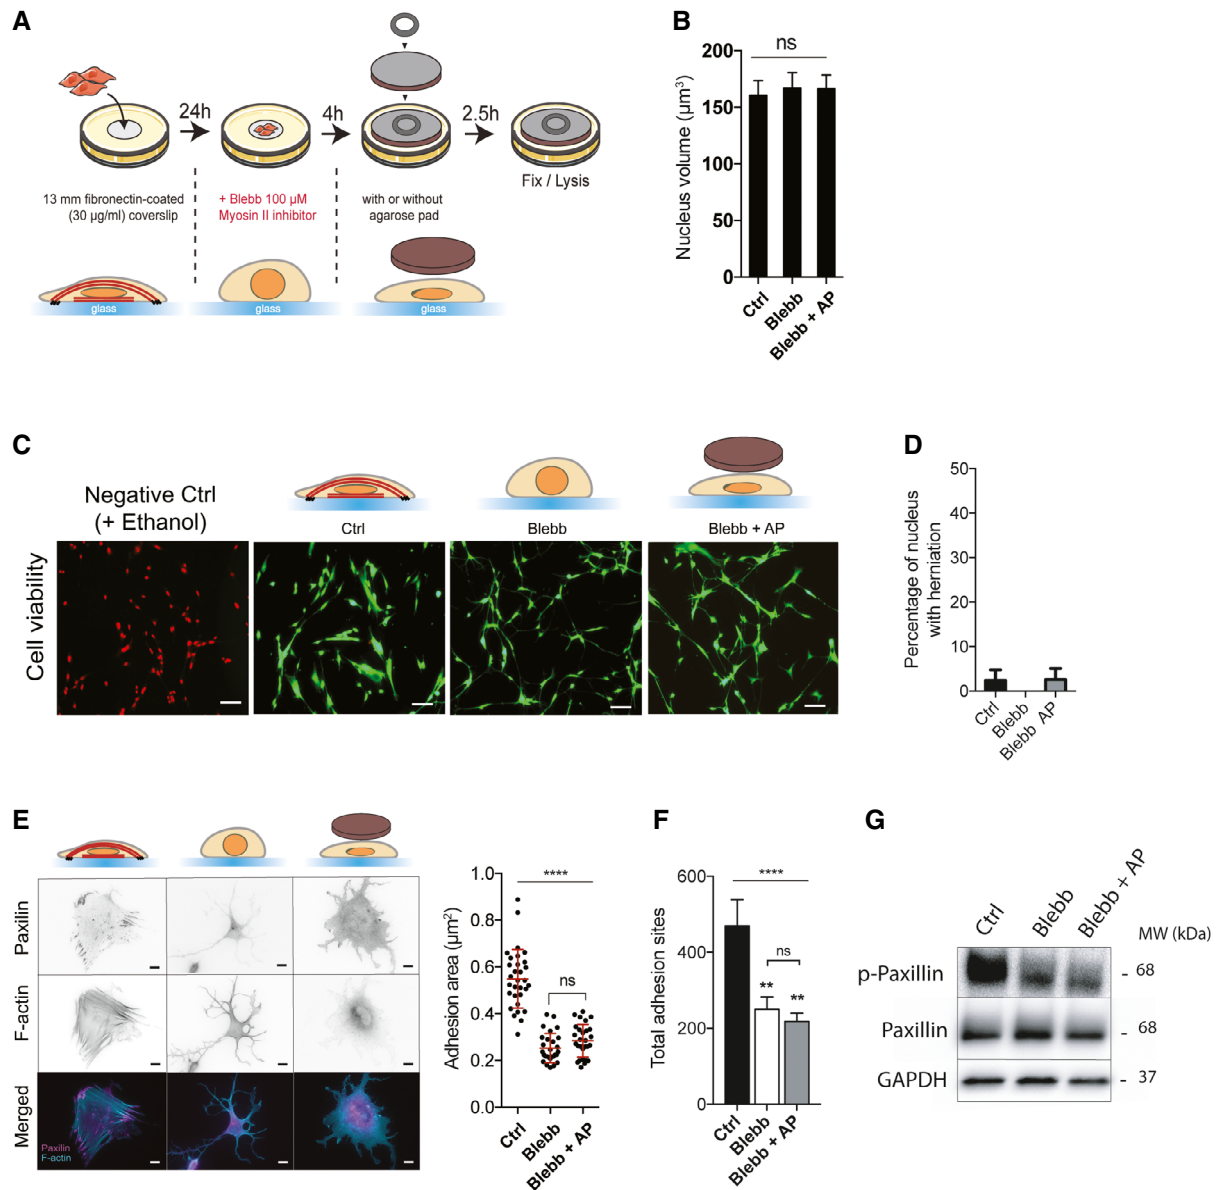

**Figure EV1. Agarose pad-mediated nuclear flattening.**

- A** MRC5 cells were cultured on a 13-mm fibronectin-coated glass coverslip (for IF) or a 35-mm fibronectin-coated dish (for biochemistry) during 24 h. The medium is replaced with a fresh medium containing blebbistatin (100  $\mu\text{M}$ ) for 4 h. Then, an agarose pad (AP) is gently applied on cells. A 32-mm coverslip with a 425 mg washer is used to maintain the agarose pad. 2.5 h later, cells are fixed using 3.7% PFA (IF) or directly lysed with a Laemmli lysis buffer.
- B** DNA staining was used to quantify nuclear volume in the indicated conditions. Data are presented as mean  $\pm$  s.e.m. ( $n = 37$  minimum from two independent experiments, ns: not significant, one-way ANOVA).
- C** Representative images of MRC5 cells assessed for cell viability using calcein/AM (green) and ethidium homodimer (Red) in Ctrl, Blebb, and Blebb + AP conditions. Ethanol was used to induce cell apoptosis (negative Ctrl).
- D** Percentage of cells with nuclear herniation. Data are presented as mean  $\pm$  s.e.m. ( $n = 40$  minimum from two independent experiments).
- E, F** Representative cells stained for actin-F (cyan) and focal adhesions (paxillin—magenta) in Ctrl, Blebb, and Blebb + AP conditions. Scale bar = 10  $\mu\text{m}$ . Quantifications of (e) adhesion areas using paxillin staining ( $n = 28$  from three independent experiments, \*\*\*\* $P < 0.001$  one-way ANOVA—Tukey's multiple comparisons post-test) and (f) total adhesion sites using p-Tyr antibody ( $n = 10$ , \*\* $P < 0.01$ , \*\*\*\* $P < 0.001$  one-way ANOVA—Tukey's multiple comparisons post-test). Data are presented as mean  $\pm$  s.e.m.
- G** Immunoblots of p-paxillin (Y118), paxillin, and GAPDH for Ctrl, Blebb, and Blebb + AP conditions.

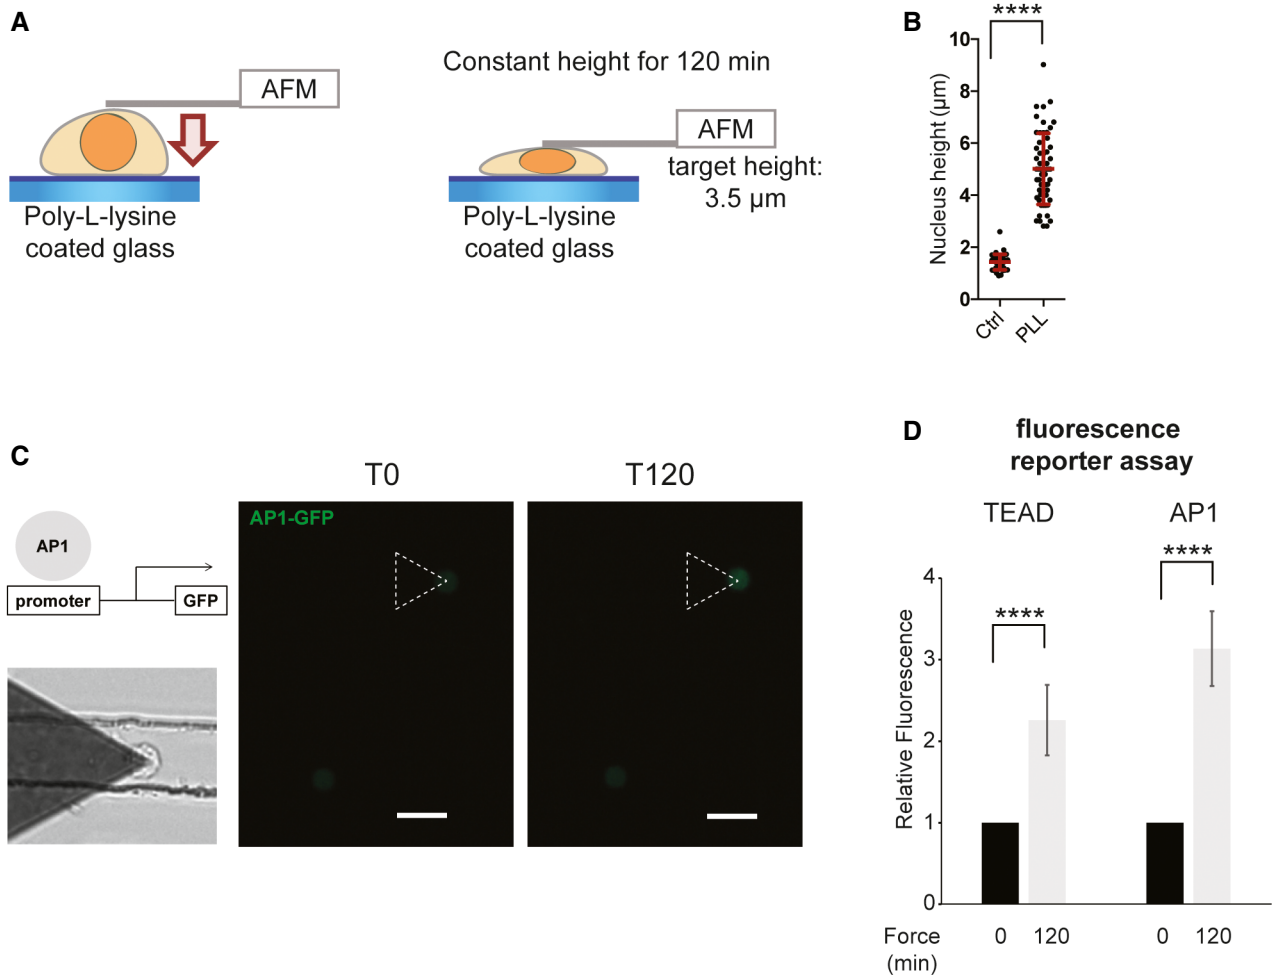

**Figure EV2. TEAD and AP1 activation in response to nuclear compression by AFM.**

A–D HeLa cells were transfected with AP1 GFP reporter or TEAD GFP reporter and plated on poly-L-lysine surface for 1 h. Then, atomic force microscopy was used to apply compressive force on the nucleus. After positioning the cantilever above the nucleus, constant height mode was used (target height of 3  $\mu\text{m}$  below the surface) and maintained for 120 min. (c) Scale bar = 20  $\mu\text{m}$ . Data are presented as mean  $\pm$  s.e.m. ( $n = 12$  minimum, \*\*\*\* $P < 0.001$  t-test).

**Figure EV3. Nuclear shape regulates transcription factor activity.**

- A Membrane spot localization of the 15 TFs regulated by nuclear shape.
- B Raw membranes of Affymetrix protein–DNA combo array kit after exposition to the ChemiDoc (Abcam) apparatus.
- C mRNA expression for corresponding TF's target genes. Using the TRRUST database, we selected genes known to be positively regulated by these 15 TFs and we analyzed their mRNA expression: SPP1 gene for FOXD3; SLC4A9 gene for FOXI1; PCSK9 gene for HNF-4; AHRR gene for AHR; SOD2 gene for NFE2L2; BAMB1 gene for FOXF2; HBB gene for NFE2L2; PPAR gene for HIF1A; TGFB1 gene for USF1; and FAM89B gene for NFIA. Only genes with increase in mRNA expression superior to 1.5-fold change in response to nuclear flattening were selected. Data are presented as mean  $\pm$  s.e.m. ( $n = 4$  minimum, t-test \* $P < 0.5$ ; ns: not significant).
- D Protein–Protein Interaction Network reconstruction and analysis of the AP1, TEAD, SP1, and PPAR.
- E Cell height was measured using AFM in cells cultured on soft or stiff matrix. Data are presented as mean  $\pm$  s.e.m. ( $n = 15$  minimum, \*\*\*\* $P < 0.001$  t-test).
- F AP1 activity was measured in cells depleted or not for c-Jun in Ctrl, Blebb, and Blebb + AP conditions. Data are presented as mean  $\pm$  s.e.m. ( $n = 5$ , \*\*\*\* $P < 0.001$  one-way ANOVA—Tukey's multiple comparisons post-test)
- G Percentage of EdU-positive cells for cells depleted or not for c-Jun and YAP. Data are presented as mean  $\pm$  s.e.m. ( $n = 4$  independent experiments with at least 60,000 events for each condition). Data have been generated from two independent experiments using two different siRNAs targeting c-Jun and YAP. \*\*\* $P < 0.01$  one-way ANOVA—Tukey's multiple comparisons post-test.
- H TEAD activity was analyzed in HeLa cells co-transfected with a Renilla plasmid as a luciferase reporter plasmid controlled by the TEAD-responsive promoter, and with a Renilla plasmid as a gene reporter; HeLa cells were depleted or not for SUN1 and SUN2. Data are presented as mean  $\pm$  s.e.m. ( $n = 6$ , t-test \* $P < 0.5$ )
- I AP1 activity was measured in cells depleted or not for SUN1 and SUN2. Data are presented as mean  $\pm$  s.e.m. ( $n = 5$ , \*\*\*\* $P < 0.001$  t-test)
- J mRNA expression for corresponding TF's target genes for HeLa cells depleted or not for SUN1 and SUN2. Data are presented as mean  $\pm$  s.e.m. ( $n = 4$ , t-test \* $P < 0.5$ ; \*\* $P < 0.1$ ; \*\*\* $P < 0.01$ ).

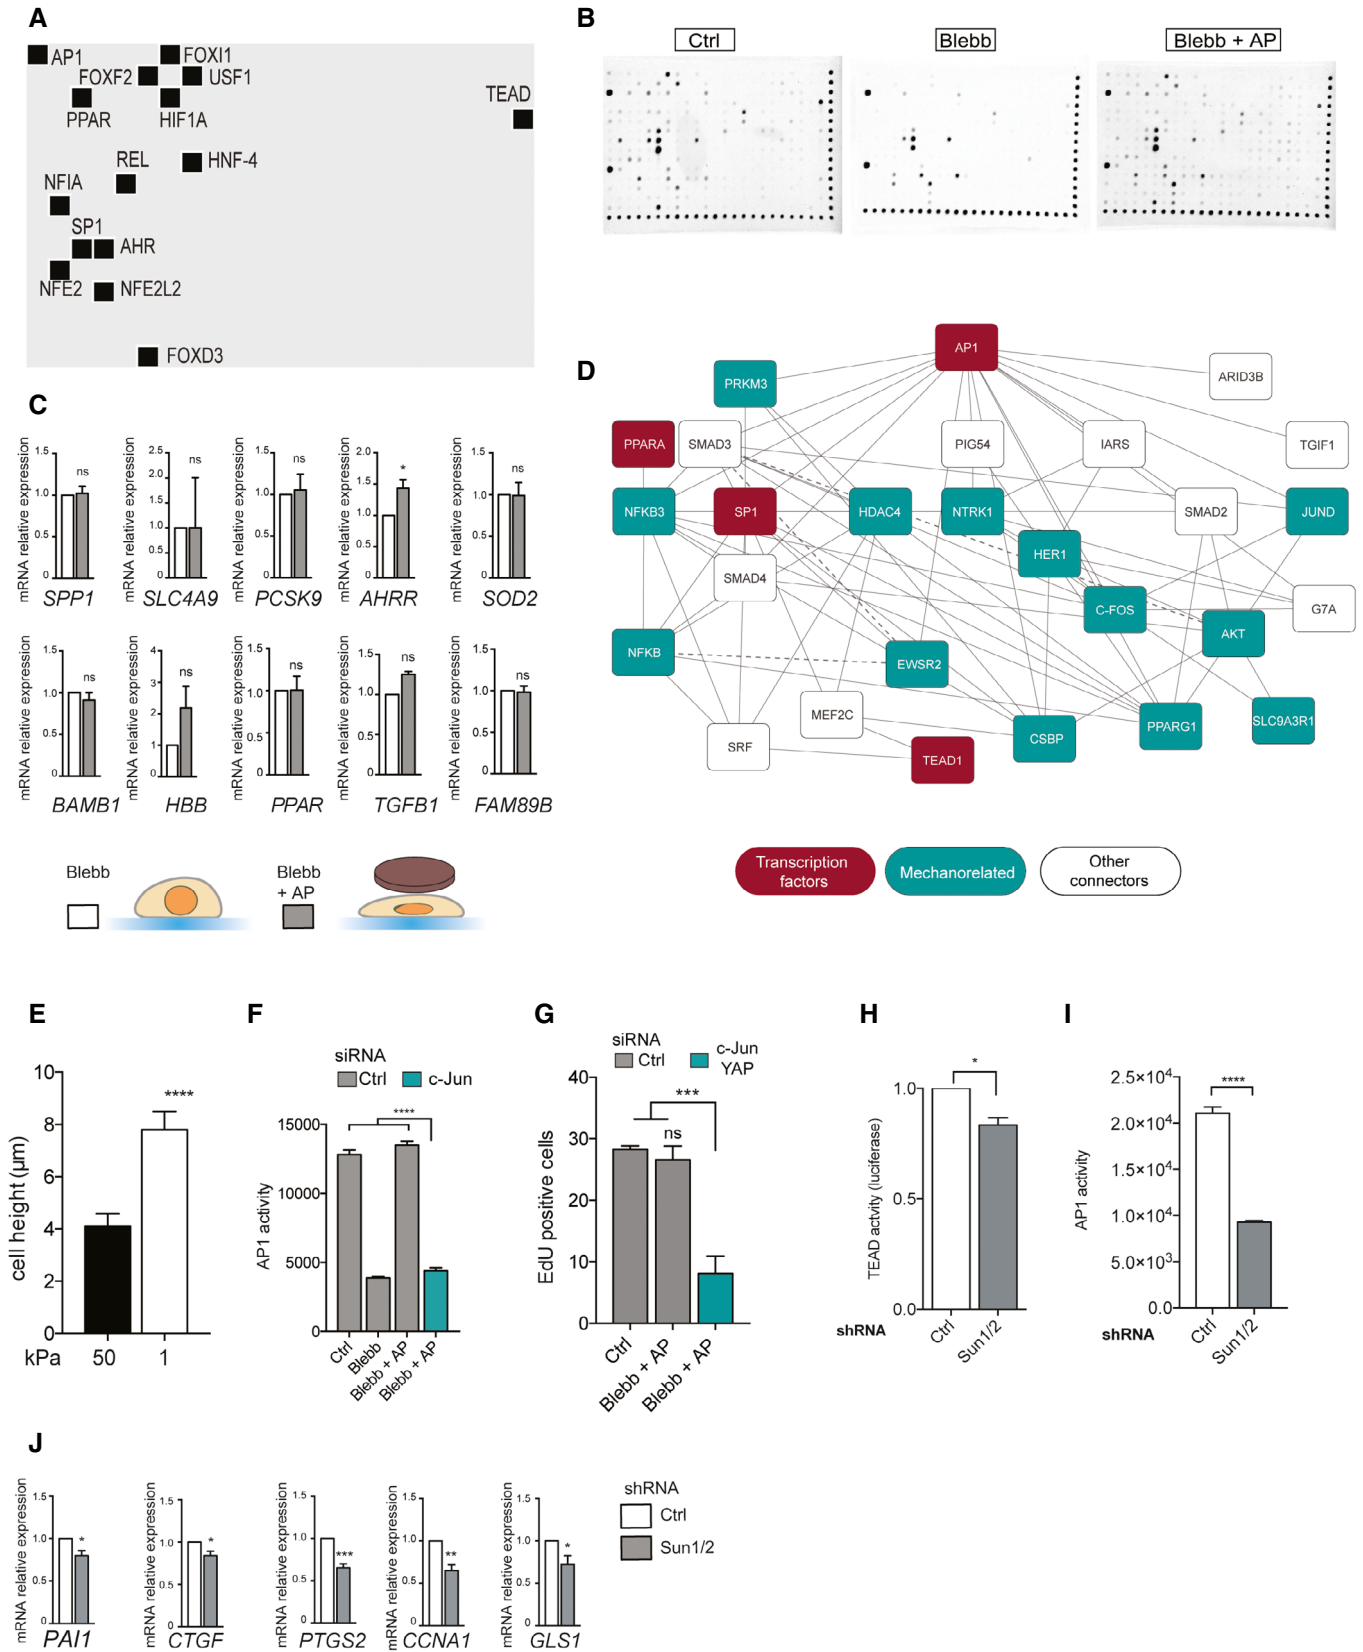

Figure EV3.

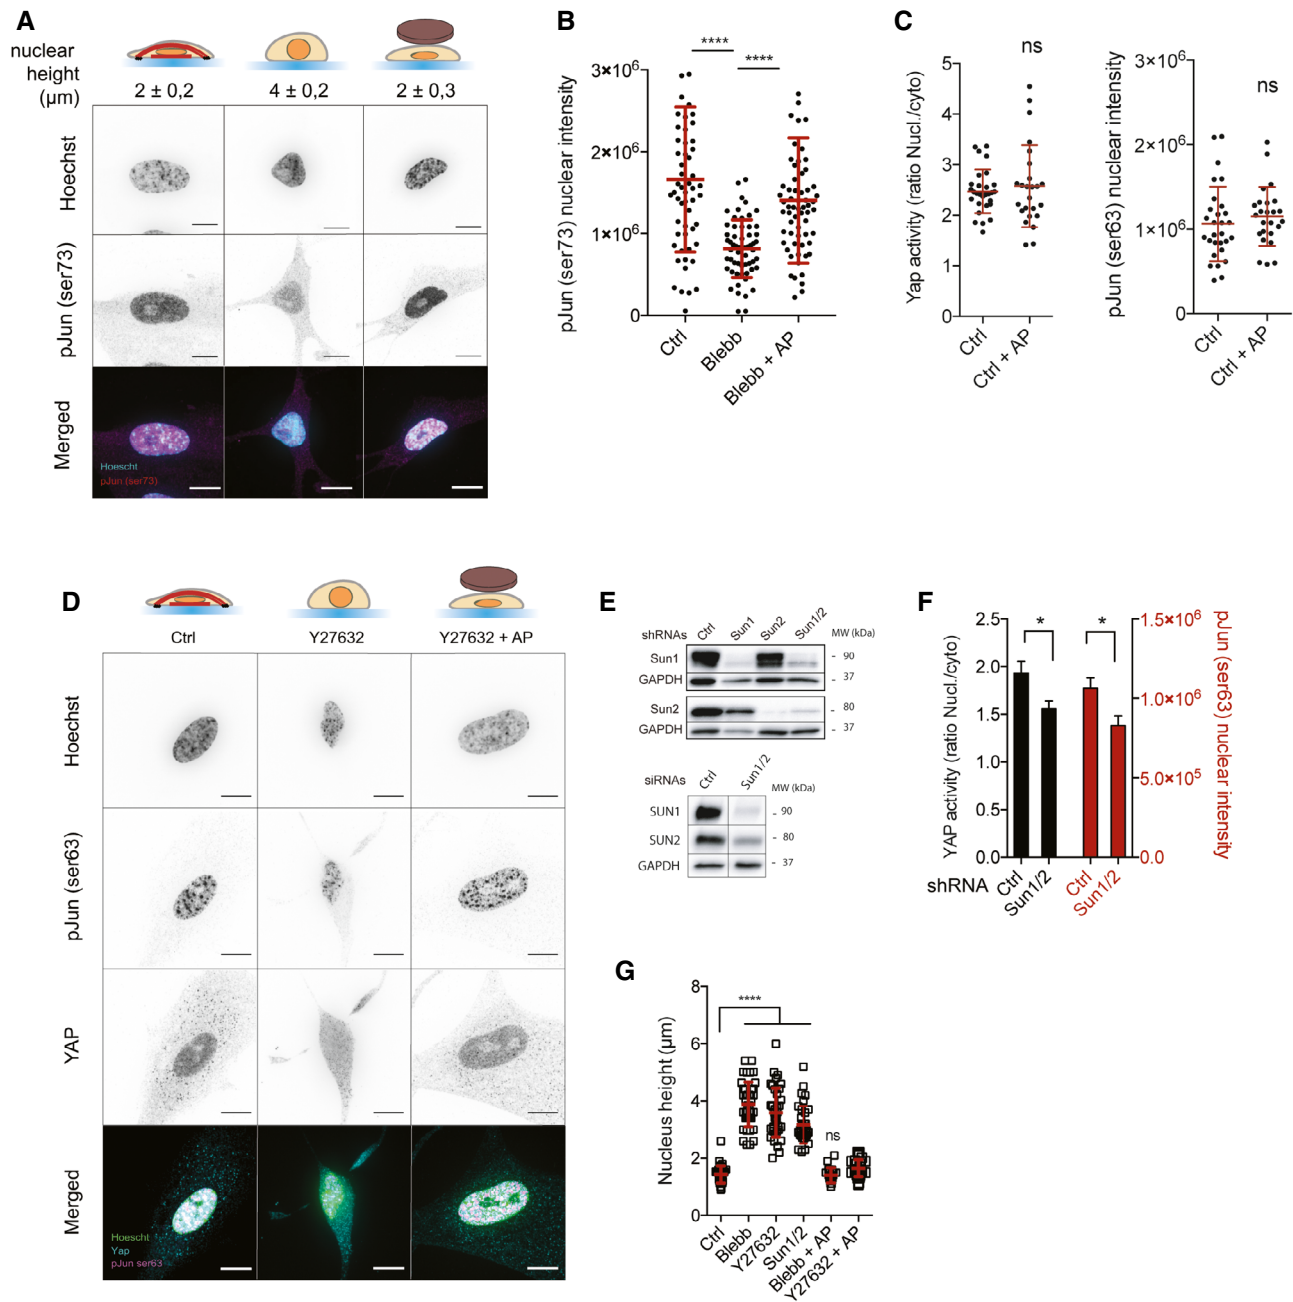

**Figure EV4. Nuclear flattening is sufficient to activate c-Jun and YAP independently of actomyosin contractility.**

- A Representative cells stained for p-Jun Ser73 (magenta) and for nucleus (cyan) in Ctrl, Blebb, and Blebb + AP conditions. Scale bar = 10  $\mu\text{m}$ . Nuclear heights were measured using Hoechst staining.
- B Corresponding quantifications of p-Jun Ser73 nuclear intensity. Data are presented as mean  $\pm$  s.e.m. ( $n = 58$  minimum from two independent experiments, \*\*\*\* $P < 0.001$  one-way ANOVA—Tukey's multiple comparisons post-test).
- C Quantifications of YAP activity (nucleo-cytoplasmic ratio) and p-Jun Ser63 nuclear intensity in Ctrl and Ctrl + AP conditions. Data are presented as mean  $\pm$  s.e.m. ( $n = 25$  minimum, ns: not significant,  $t$ -test).
- D Representative cells stained for p-Jun Ser63 (magenta) and for DNA (cyan) in Ctrl, Y27632, and Y27632 + AP conditions. Scale bar = 10  $\mu\text{m}$ .
- E Immunoblots of SUN1, SUN2, and GAPDH for MRC5 cells depleted or not for SUN1, SUN2, and SUN1 and SUN2 using siRNA or shRNA approaches.
- F Quantifications of YAP activity (nucleo-cytoplasmic ratio) and p-Jun Ser63 nuclear intensity in cells depleted or not for SUN1 and SUN2. Data are presented as mean  $\pm$  s.e.m. ( $n = 20$  minimum,  $t$ -test \* $P < 0.5$ ).
- G Nucleus heights were measured using Hoechst staining in the indicated conditions. Data are presented as mean  $\pm$  s.e.m. ( $n = 18$  minimum, \*\*\*\* $P < 0.001$  one-way ANOVA—Tukey's multiple comparisons post-test).

**Figure EV5. Molecular mechanisms mediating YAP and c-Jun activation in response to nuclear flattening.**

- A Representative cells stained for p-Jun Ser63 (magenta) and for DNA (cyan) in Ctrl, Blebb, and Blebb + AP conditions, treated or not with importazole. Scale bar = 10  $\mu$ m.
- B Quantifications of p-Jun Ser63 nuclear intensity in Ctrl, Blebb, and Blebb + AP conditions, treated or not with importazole. Data are presented as mean  $\pm$  s.e.m. ( $n = 44$  minimum from two independent experiments, \*\*\*\* $P < 0.001$  one-way ANOVA—Tukey's multiple comparisons post-test).
- C Immunoblots of p-YAP (Ser127), YAP, and GFP for HeLa cells transfected with these following plasmids: Ctrl-GFP, LATS1<sup>WT</sup>-GFP, LATS1<sup>T1079E</sup>-GFP, LATS1<sup>T1079D</sup>-GFP.
- D Quantifications of YAP activity (nucleo-cytoplasmic ratio) in Ctrl, Blebb, and Blebb + AP conditions for cells transfected with GFP, LATS1-GFP, LATS1<sup>T1079E</sup>-GFP, or LATS1<sup>T1079D</sup>-GFP. Data are presented as mean  $\pm$  s.e.m. ( $n = 18$  minimum \*\*\*\* $P < 0.001$  one-way ANOVA—Tukey's multiple comparisons post-test).
- E Nuclear heights were measured for cells transfected with GFP in Ctrl and Blebb conditions, and for those transfected with LATS1-GFP, LATS1<sup>T1079E</sup>-GFP, LATS1<sup>T1079D</sup>-GFP in Ctrl condition. Data are presented as mean  $\pm$  s.e.m. ( $n = 18$  minimum \*\*\*\* $P < 0.001$  one-way ANOVA—Tukey's multiple comparisons post-test).
- F Immunoblots of lamin A/C and vinculin for MRC-5 cells depleted or not for lamin A/C.
- G Quantification of YAP activity in Ctrl, Blebb, and Blebb + AP conditions for cells depleted or not for lamin A/C. Data are presented as mean  $\pm$  s.e.m. ( $n = 48$  minimum (TOP),  $n = 12$  minimum (BOTTOM), \*\*\*\* $P < 0.001$ , \* $P < 0.05$  one-way ANOVA—Tukey's multiple comparisons post-test).
- H Representative cells stained for p-Jun Ser63 (magenta), for YAP (cyan), and for DNA (green) treated with ATR/ATM inhibitor. Scale bar = 10  $\mu$ m.
- I Quantifications of p-Jun Ser63 nuclear intensity in Ctrl, Blebb, and Blebb + AP conditions for cells treated with an ATR/ATM inhibitor. Data are presented as mean  $\pm$  s.e.m. ( $n = 30$ , \*\*\*\* $P < 0.001$  one-way ANOVA—Tukey's multiple comparisons post-test).

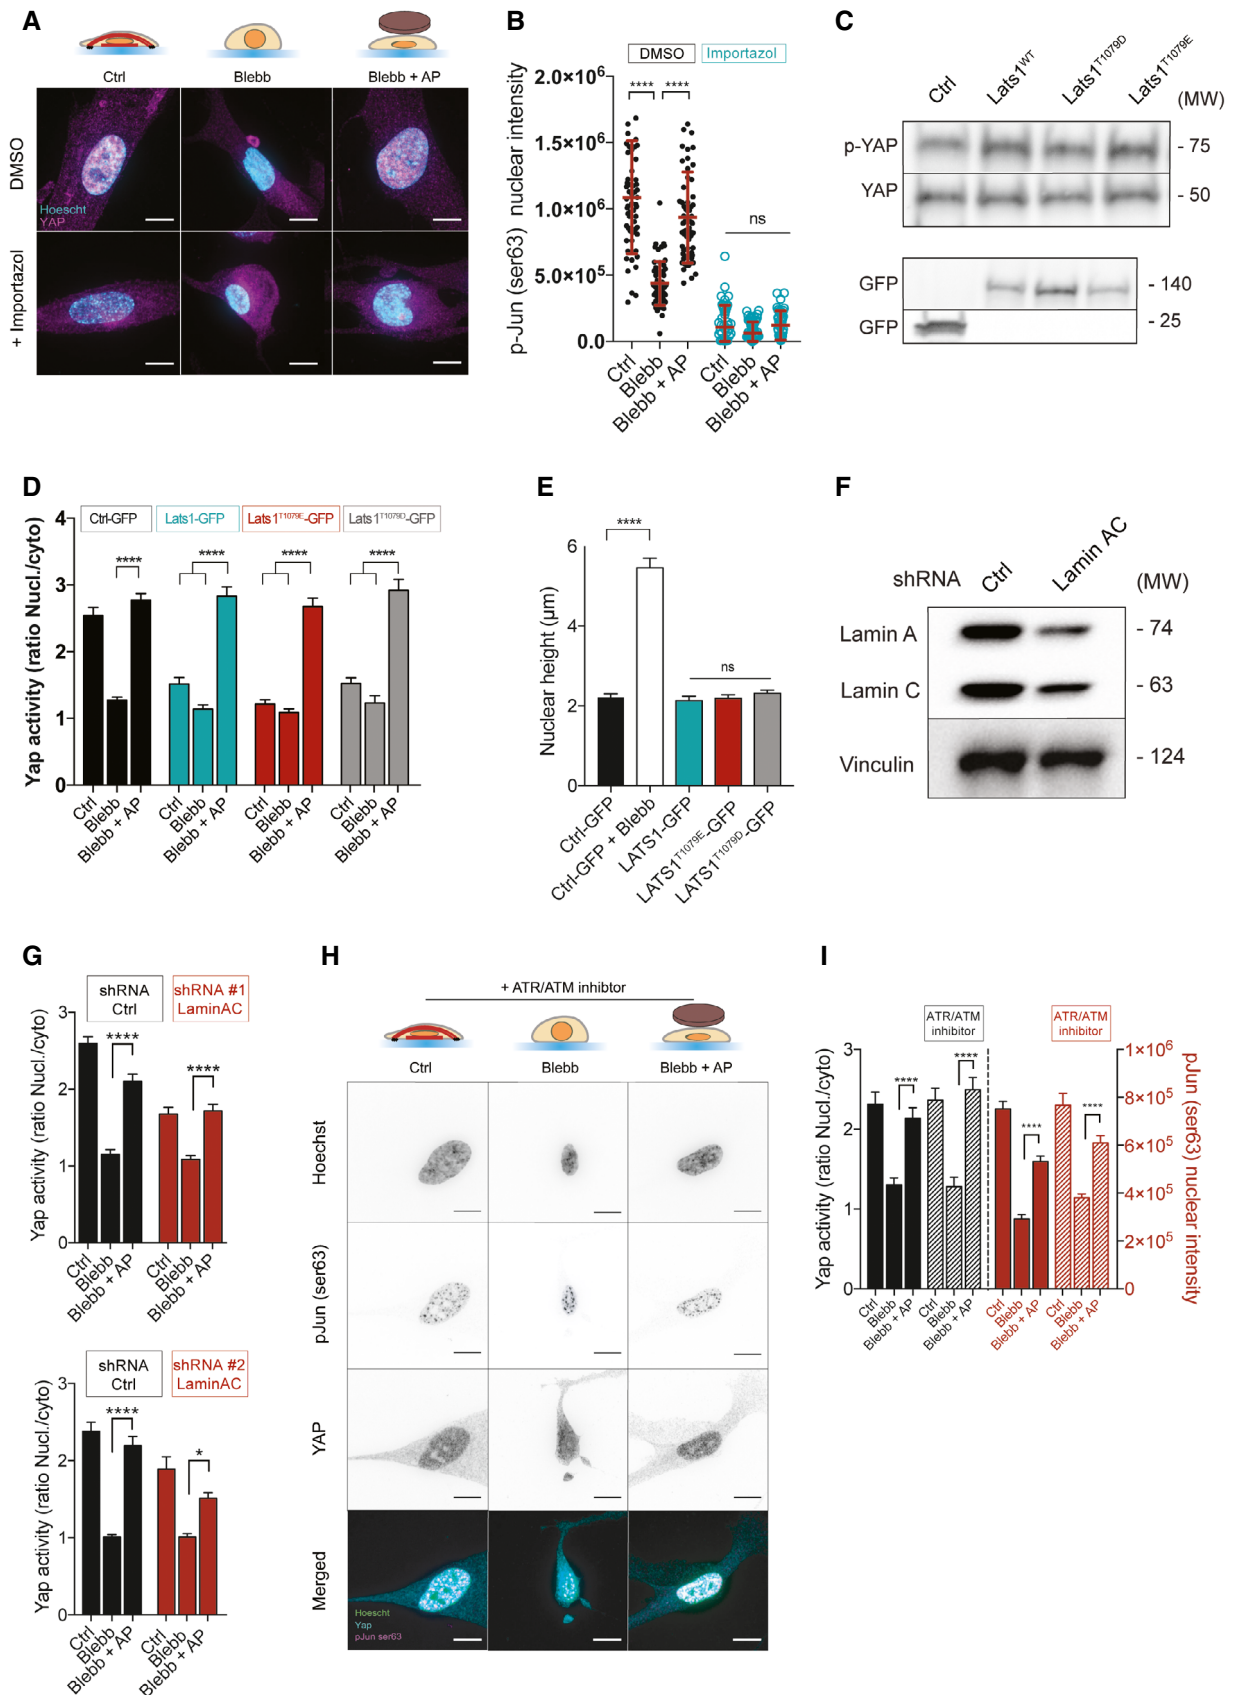

Figure EV5.
