# Supplementary material for: Nuclear envelope deformation controls cell cycle progression in response to mechanical force
Source: PubMed Central journal article supplement (PMC6726894; doi:10.15252/embr.201948084), 2019-08-01
Supplement: EMBR-20-e48084-s002.pdf [file EMBR-20-e48084-s002.pdf]

**Table EV1.** Antibody listing

| <b>Name</b>                   | <b>Supplier</b> | <b>Ref</b> | <b>Concentration</b> | <b>Method</b> |
|-------------------------------|-----------------|------------|----------------------|---------------|
| Cdt1                          | Abcam           | ab236152   | 1/750                | IF            |
| GADPH                         | Thermofisher    | MA5-15738  | 1/2000               | WB            |
| Geminin                       | Abcam           | 104306     | 1/250                | IF            |
| GFP                           | Santa Cruz      | sc9996     | 1/250                | WB            |
| JNK                           | Cell signaling  | 9252       | 1/750                | WB            |
| p-JNK (Thr183/Tyr185)         | Cell signaling  | 9251       | 1/750                | WB            |
| p-c-Jun (ser73)               | Abcam           | ab30620    | 1/250                | IF            |
| p-c-Jun (ser63)               | Cell signaling  | 2361       | 1/250                | IF            |
| KIBRA                         | Cell signaling  | 8774       | 1/1000               | WB            |
| Lamin A                       | Abcam           | Ab26300    | 1/2000               | IF            |
| LATS1                         | Cell signaling  | 3477       | 1/1000               | WB            |
| p-LATS1 (Thr1079)             | Cell signaling  | 8654       | 1/1000               | WB            |
| MST1                          | Cell signaling  | 3682       | 1/1000               | WB            |
| p-MST1 (Thr183)/MST2 (Thr180) | Cell signaling  | 3681       | 1/1000               | WB            |
| PTPN14                        | Cell signaling  | 13808      | 1/1000               | WB            |
| Sun1                          | Abcam           | Ab124770   | 1/750                | WB            |
| Sun2                          | Abcam           | Ab124916   | 1/750                | WB            |
| paxillin                      | Abcam           | 32084      | 1/250                | IF            |
| paxillin                      | Abcam           | 32084      | 1/750                | WB            |
| p-paxillin (Y118)             | Cell signaling  | 2541       | 1/750                | WB            |
| Vinculin                      | Sigma           | V9131      | 1/2000               | WB            |
| Yap                           | Santa Cruz      | Sc101199   | 1/200                | IF            |
| Yap                           | Cell signaling  | 8418       | 1/1000               | WB            |
| p-Yap (ser127)                | Cell signaling  | 13008      | 1/1000               | WB            |
| Alexa 568 goat anti Mouse     | Invitrogen      | A11004     | 1/500                | IF            |
| Alexa 488 goat anti Rabbit    | Invitrogen      | A11008     | 1/500                | IF            |
| Alexa Fluor 647 Phalloidin    | Invitrogen      | A22287     | 1/50                 | IF            |
