# Supplementary material for: Nuclear envelope deformation controls cell cycle progression in response to mechanical force
Source: PubMed Central journal article supplement (PMC6726894; doi:10.15252/embr.201948084), 2019-08-01
Supplement: EMBR-20-e48084-s003.pdf [file EMBR-20-e48084-s003.pdf]

Table EV2: Taqman gene primers ID

|    | <b>genes</b>     | <b>Assay ID</b> |
|----|------------------|-----------------|
| 1  | <i>gapdh</i>     | Hs02786624_g1   |
| 2  | <i>RPS6</i>      | Hs04195024_g1   |
| 3  | <i>18s</i>       | Hs03003631_g1   |
| 4  | <i>SERPINE1</i>  | Hs00167155_m1   |
| 5  | <i>CCND1</i>     | Hs00765553_m1   |
| 6  | <i>ITGB2</i>     | Hs00164957_m1   |
| 7  | <i>EGR1</i>      | Hs00152928_m1   |
| 8  | <i>CTGF</i>      | Hs00170014_m1   |
| 9  | <i>PTGS2</i>     | Hs00153133_m1   |
| 10 | <i>TGFB1</i>     | Hs00998133_m1   |
| 11 | <i>TGFB2</i>     | Hs00234244_m1   |
| 12 | <i>MMP2</i>      | Hs01548727_m1   |
| 13 | <i>MMP7</i>      | Hs01042796_m1   |
| 14 | <i>CDKN1A</i>    | Hs00355782_m1   |
| 15 | <i>MYC</i>       | Hs00153408_m1   |
| 16 | <i>IL6</i>       | Hs00174131_m1   |
| 17 | <i>CREM</i>      | Hs01582003_g1   |
| 18 | <i>CXCR4</i>     | Hs00607978_s1   |
| 19 | <i>Cyclin A1</i> | Hs00171105_m1   |
| 20 | <i>gls1</i>      | Hs01014020_m1   |
| 21 | <i>vinculin</i>  | Hs00419715_m1   |
| 22 | <i>SRF</i>       | Hs01065256_m1   |
| 23 | <i>sdpr</i>      | Hs00190538_m1   |
| 24 | <i>FOS</i>       | Hs04194186_s1   |
| 25 | <i>gata6</i>     | Hs00232018_m1   |
| 26 | <i>FAM89B</i>    | Hs00822402_g1   |
| 27 | <i>Hbb</i>       | Hs00758889_s1   |
| 28 | <i>CETP</i>      | Hs00163942_m1   |
| 29 | <i>LPL</i>       | Hs00173425_m1   |
| 30 | <i>Coll11A2</i>  | Hs00899176_m1   |
| 31 | <i>AHRR</i>      | Hs01005075_m1   |
| 32 | <i>SOD2</i>      | Hs00167309_m1   |
| 33 | <i>BAMBI</i>     | Hs03044164_m1   |
| 34 | <i>CXCL12</i>    | Hs03676656_mH   |
| 35 | <i>SPP1</i>      | Hs00959010_m1   |
| 36 | <i>RARB</i>      | Hs00977140_m1   |
| 37 | <i>Slc4a9</i>    | Hs00324675_m1   |
| 38 | <i>Col1A1</i>    | Hs00164004_m1   |
| 39 | <i>Glut1</i>     | Hs00892681_m1   |
| 40 | <i>Fabp7</i>     | Hs00361424_g1   |
| 41 | <i>Sod1</i>      | Hs00533490_m1   |
| 42 | <i>PCSK9</i>     | Hs00545399_m1   |
| 43 | <i>CXCR4</i>     | Hs00607978_s1   |
| 44 | <i>sp1</i>       | Hs00916521_m1   |
| 45 | <i>c-Jun</i>     | Hs01103582_s1   |
| 46 | <i>hnf4</i>      | Hs00230853_m1   |
| 47 | <i>PPAR</i>      | Hs00947536_m1   |
| 48 | <i>AHR</i>       | Hs00169233_m1   |
